# Supplementary material for: Comparative analysis of adeno-associated virus serotypes for gene transfer in organotypic heart slices
Source: PubMed Central journal article supplement (PMC7673099; doi:10.1186/s12967-020-02605-4), 2020-11-18

mCherry

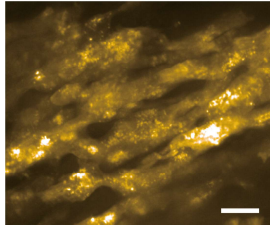

cTNT

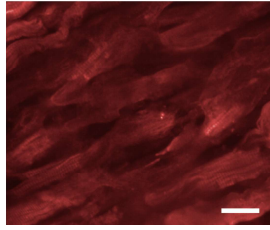

DAPI

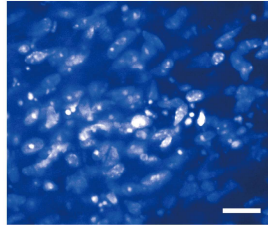

Merged

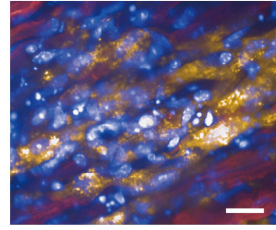

Supplement: 12967_2020_2605_MOESM1_ESM.pdf [file 12967_2020_2605_MOESM1_ESM.pdf]
